# Supplementary material for: F-Box Protein 43, Stabilized by N6-Methyladenosine Methylation, Enhances Hepatocellular Carcinoma Cell Growth and Invasion via Promoting p53 Degradation in a Ubiquitin Conjugating Enzyme E2 C-Dependent Manner
Source: MDPI journal article supplement (doi:10.3390/cancers15030957), 2023-02-02

## Supplementary Figure legends

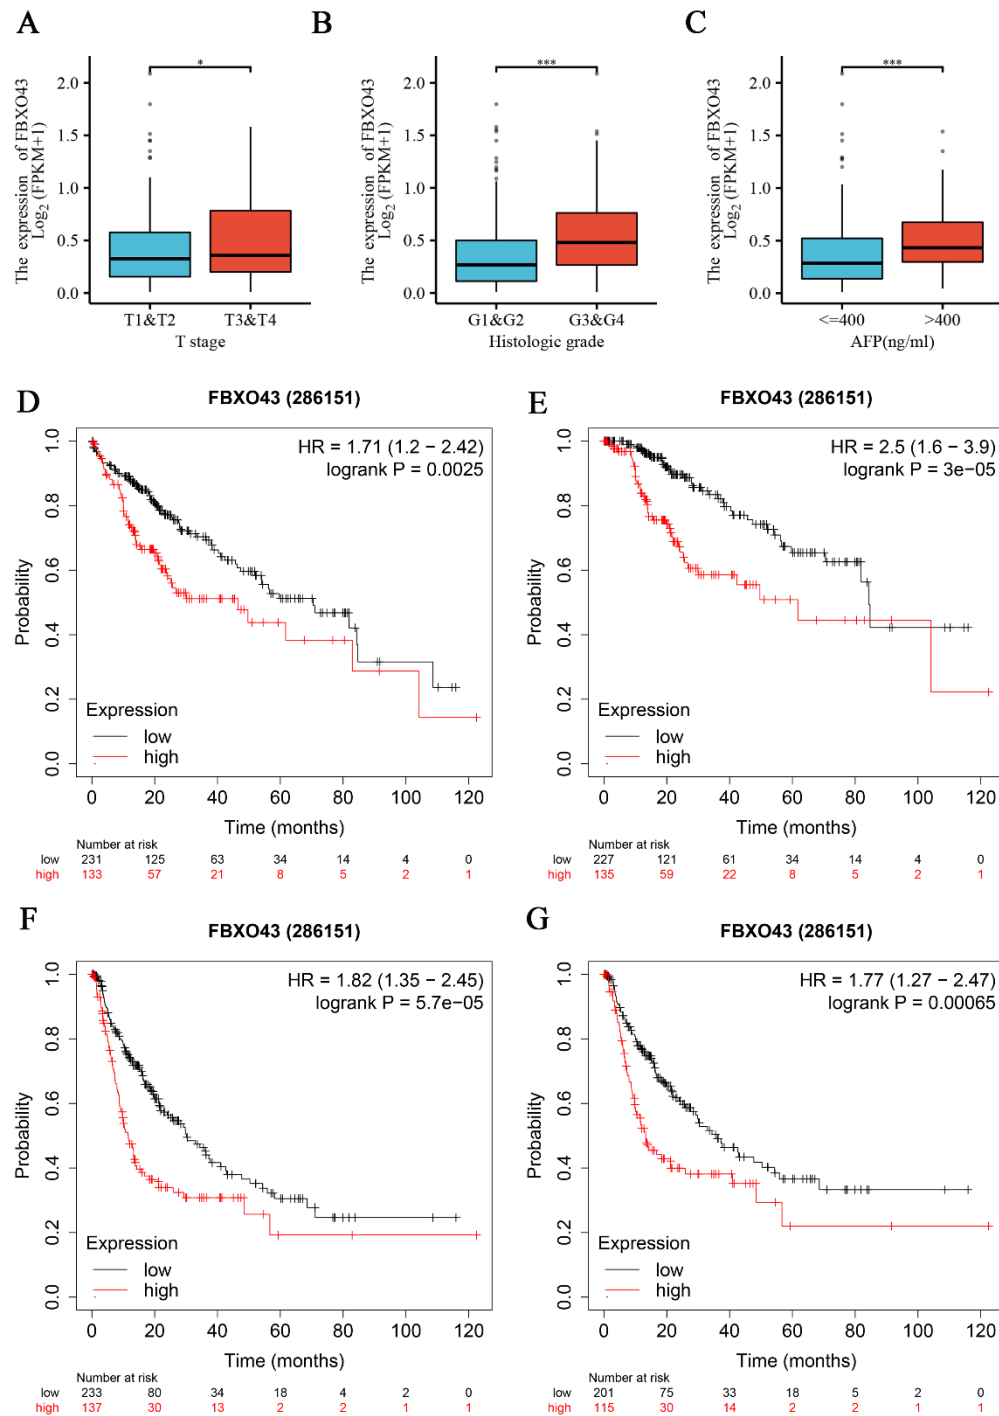

**Supplementary Figure S1. The expression of FBXO43 in subtype of HCC and its prognostic value based on Kaplan-Meier Plotter data.** The expression of FBXO43 in subtype of HCC patients: (A) stage T1 plus T2 vs T3 plus T4; (B) grade G1 plus G2 vs G3 plus G4; (C) AFP (≤400 ng/ml) vs AFP (>400 ng/ml). The survival curves from Kaplan-Meier Plotter indicating the prognostic value of FBXO43 including OS (D),



HCC tissues with low and high FBXO43 expression in TCGA. **(B)** The expression of UBE2T in HCC tissues with low and high FBXO43 and its correlation with FBXO43 in HCC tissues. **(C)** The expression of UBE2S in HCC tissues with low and high FBXO43 and its correlation with FBXO43 in HCC tissues. **(D)** RT-qPCR indicating the expression of UBE2T and UBE2S in HepG2 and HCCLM3 cells with FBXO43 depletion. \*\*\*,  $P < 0.001$ ; ns, no significant difference.

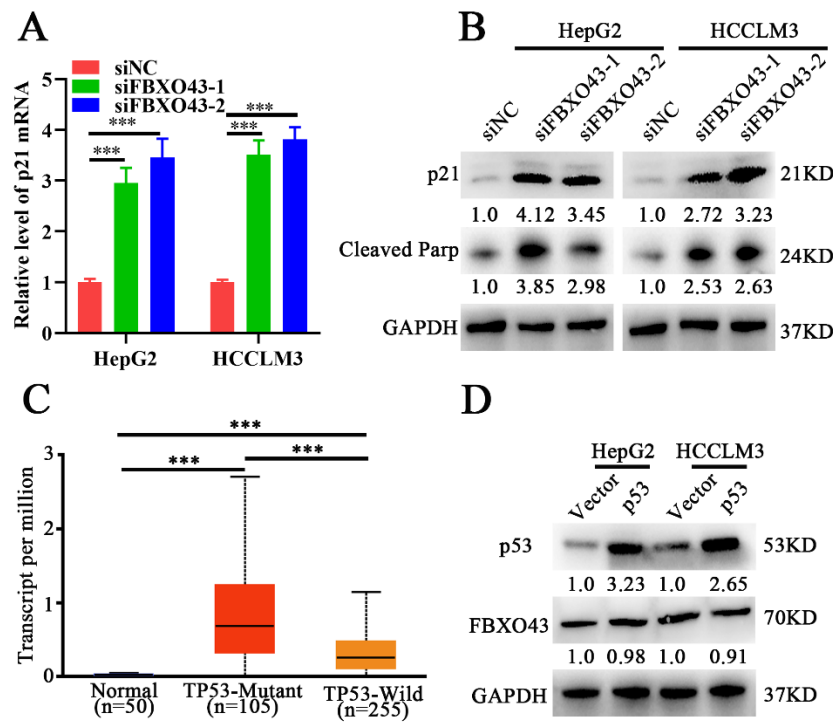

**Supplementary Figure S4. Analyzing the relation between FBXO43 and p53 status in HCC.** **(A)** RT-qPCR indicating the expression of p21 in HepG2 and HCCLM3 cells with FBXO43 depletion. **(B)** WB results indicating the level of p21 and cleaved-Parp in HepG2 and HCCLM3 cells with FBXO43 depletion **(C)** The UALCAN data showing the expression of TP53 among normal, TP53-mutant, and TP52- wild HCC tissues. **(D)** WB results indicating the level of p53 and FBXO43 in HepG2 and HCCLM3 cells with p53 overexpression. \*\*\*,  $P < 0.001$ .

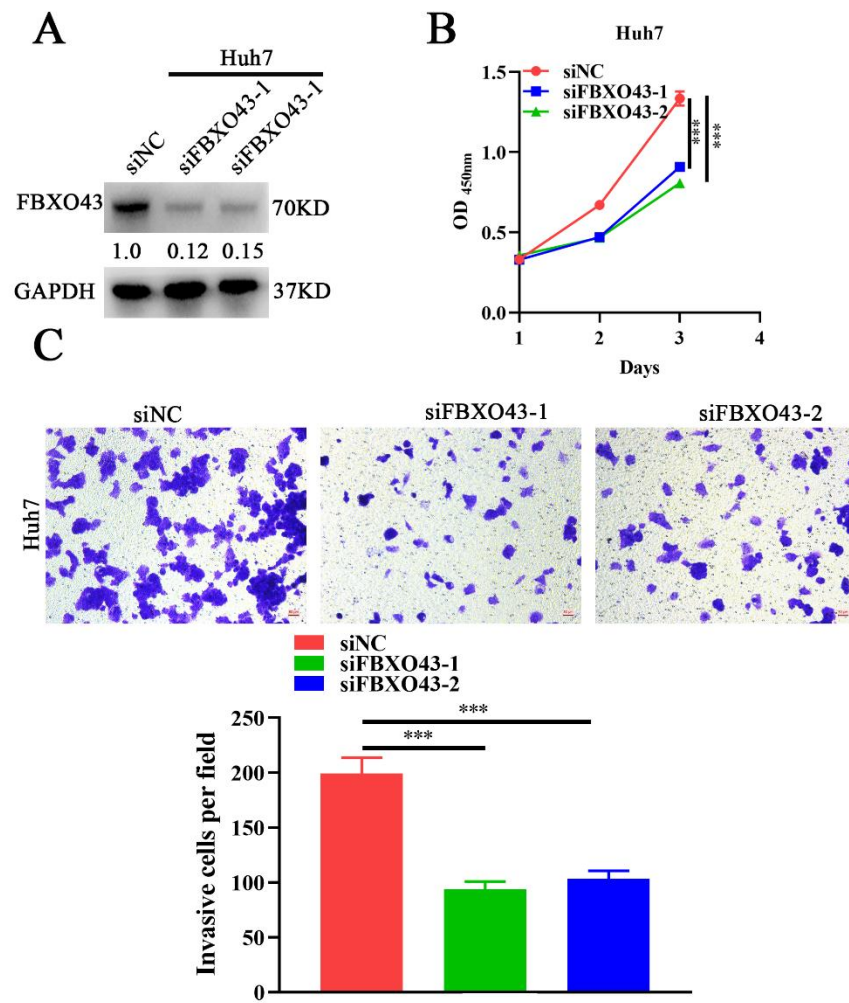

**Supplementary Figure S5. FBXO43 knockdown inhibits cell growth and invasion in Huh7.** (A) WB results indicating the protein level of FBXO43 in Huh7 cells transfected with siFBXO43s. qRT-PCR. CCK-8 (B) and Transwell (C) assay showing the effects of FBXO43 depletion on the growth and invasion of Huh7 cells. Magnification 100×, Scale bar 50μm. \*\*\*,  $P < 0.001$ .

**Supplementary Table S1.** The sequences of primers and siRNAs

| <b>Names</b>                | <b>Sequences(5'-3')</b>                    |
|-----------------------------|--------------------------------------------|
| <b>FBXO43</b>               |                                            |
| Forward                     | GGAAAGTAAGCAGAAATTGGCGTG                   |
| Reverse                     | GAGTGGCAGCATCCTCGACATT                     |
| <b>FBXO43 hnRNA</b>         |                                            |
| Forward                     | CAGTTGCGAAGAACCACGTTT                      |
| Reverse                     | AGTTGCCTCCAACGTCCTTT                       |
| <b>IGF2BP2</b>              |                                            |
| Forward                     | AGTGGAATTGCATGGGAAAATCA                    |
| Reverse                     | CAACGGCGGTTTCTGTGTC                        |
| <b>METTL3</b>               |                                            |
| Forward                     | TTGTCTCCAACCTTCCGTAGT                      |
| Reverse                     | CCAGATCAGAGAGGTGGTGTAG                     |
| <b>UBE2C</b>                |                                            |
| Forward                     | CTGGCGATAAAGGGATTTCTGCC                    |
| Reverse                     | GCGAGAGCTTATACCTCAGGTC                     |
| <b>UBE2T</b>                |                                            |
| Forward                     | AGCTGCTCATGTCAGAACCCAAC                    |
| Reverse                     | GTCTGGCATTCTTGAGGAAGGC                     |
| <b>UBE2S</b>                |                                            |
| Forward                     | CCGACACGTACTGCTGACC                        |
| Reverse                     | GCCGCATACTCCTCGTAGTTC                      |
| <b>p53</b>                  |                                            |
| Forward                     | CCTCAGCATCTTATCCGAGTGG                     |
| Reverse                     | TGGATGGTGGTACAGTCAGAGC                     |
| <b>p21</b>                  |                                            |
| Forward                     | TGTCCGTCAGAACCCATGC                        |
| Reverse                     | AAAGTCGAAGTTCCATCGCTC                      |
| <b>GAPDH</b>                |                                            |
| Forward                     | CAGCAAGAGCACAAGAGGAA                       |
| Reverse                     | ATGGTACATGACAAGGTGCGG                      |
| <b>T7-FBOX43 sense</b>      |                                            |
| Forward                     | TAATACGACTCACTATAGGGATGAGTTTTAAAGACAAAGAT  |
| Reverse                     | GAGGCGTTTTTAAATTCCGCTT                     |
| <b>T7-FBOX43 anti-sense</b> |                                            |
| Forward                     | TAATACGACTCACTATAGGGGAGGCGTTTTTAAATTCCGCTT |
| Reverse                     | ATGAGTTTTTAAAGACAAAGATG                    |
| <b>siFBOX43-1</b>           | CGTGAAATTGTTGTTCAAGAT                      |
| <b>siFBOX43-2</b>           | GCCAAGTTATCAACTTAGAAA                      |
| <b>siIGF2BP2</b>            | AGTGAAGCTGGAAGCGCATAT                      |
| <b>siMETTL3</b>             | GCCAAGGAACAATCCATTGTT                      |

**Supplementary Table S2.** The M6A sites of FBXO43 predicted by SRAMP database

| Position | Sequence context                                           | Score<br>(binary) | Score<br>(knn) | Score<br>(spectrum) | Score<br>(combined) | Decision(site confidence) |
|----------|------------------------------------------------------------|-------------------|----------------|---------------------|---------------------|---------------------------|
| 837      | ACTGAAGCAGGAAATGGGGCGG <u>A</u><br>CTCTCCTCCAATTGTCAACTCC  | 0.647             | 0.731          | 0.517               | 0.599               | High                      |
| 1102     | AGGAAAAGGATAAAACCCCAGAA <u>A</u><br>CTTTGTGAAACACCTAAAATCA | 0.718             | 0.634          | 0.593               | 0.664               | Very high                 |
| 1185     | TCTTTCGCTCTTCTAAAAGGGG <u>A</u> C<br>TTTGAATCACAAAATAGTTCT | 0.763             | 0.879          | 0.549               | 0.683               | Very high                 |
| 1331     | CACTTTAAAAACAGAAGAAGTGA <u>A</u><br>CTTCATGCAGTCAAAAATTGAG | 0.566             | 0.699          | 0.582               | 0.579               | Moderate                  |
| 1376     | GCTTAATTTTCTCAGCAAAAG <u>A</u> C<br>TTCCACAATTGATGATTCCAA  | 0.619             | 0.758          | 0.496               | 0.577               | Moderate                  |
| 1461     | ATTCAGGGCAATAATTTTAAAG <u>A</u> CT<br>CTATCACACATGACTTTAGT | 0.661             | 0.723          | 0.480               | 0.592               | Moderate                  |
| 1753     | ACCAGGAGGGTTCTTTTCAAGA <u>A</u> C<br>TACTGCAGAAACATAAGGGGA | 0.563             | 0.498          | 0.603               | 0.576               | Moderate                  |
| 1775     | ACTACTGCAGAAACATAAGGGG <u>A</u> C<br>TCCCAAAGTTGGGGACACCAT | 0.639             | 0.696          | 0.613               | 0.631               | High                      |
| 1791     | AAGGGGACTCCCAAAGTTGGGG <u>A</u><br>CACCATAAGAAAGACAAGACAT  | 0.581             | 0.418          | 0.611               | 0.585               | Moderate                  |
| 1831     | GACATCTTGAAGGTCGAGAAG <u>A</u><br>CTGTCCACCCTTCGGGAACAAA   | 0.578             | 0.507          | 0.516               | 0.550               | Low                       |
| 2134     | TACTGCAGTGTATACTTGCAGG <u>A</u> C<br>TGATCGGCAAGAAAATGGGTA | 0.730             | 0.797          | 0.645               | 0.699               | Very high                 |

|      |                                                            |       |       |       |       |           |
|------|------------------------------------------------------------|-------|-------|-------|-------|-----------|
| 2164 | GCAAGAAAATGGGTATAGAAAAAC<br>TGGACATCTTAACAGAATTAA          | 0.578 | 0.644 | 0.674 | 0.620 | High      |
| 2169 | AAAATGGGTATAGAAAA <u>ACT</u> GGAC<br>ATCTTAACAGAATTAAAATAT | 0.631 | 0.765 | 0.653 | 0.646 | High      |
| 2650 | ACCAGCCATATAAGAAAAGGGG <u>AC</u><br>TGTGTAGCCGAACAGCCTGTG  | 0.759 | 0.606 | 0.315 | 0.574 | Moderate  |
| 2814 | AATTTAAAACGCCTCTGAAGAG <u>AC</u><br>TAAATATAGAACTCCCCCATG  | 0.659 | 0.547 | 0.658 | 0.653 | Very high |
| 2826 | CTCTGAAGAGACTAAATATAGA <u>AC</u><br>TCCCCCATGCAGTGTTCTATT  | 0.561 | 0.536 | 0.669 | 0.603 | High      |
| 3173 | CAGATAATATTAAAGATTTTGA <u>ACT</u><br>CTAGACAGATGGCCTTATAG  | 0.691 | 0.685 | 0.567 | 0.641 | High      |
| 3216 | AGATTTGGAAAATGAGTACTTG <u>AC</u><br>TGAAATGAAATATAAATAAAA  | 0.624 | 0.689 | 0.570 | 0.606 | High      |

---

**Both uncropped exposure and white pictures were offered as follow:**

**Figure 2B**

**FBXO43**

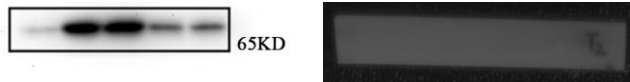

**GAPDH**

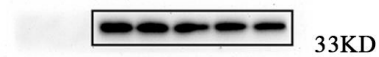

**Figure 2D**

**FBXO43**

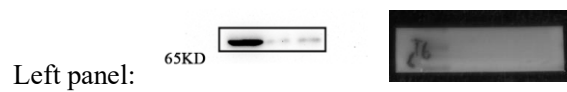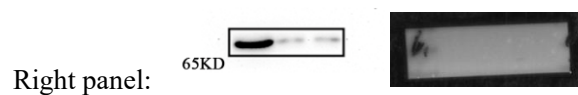

**GAPDH**

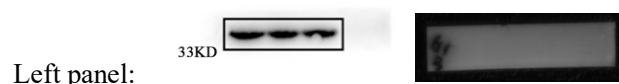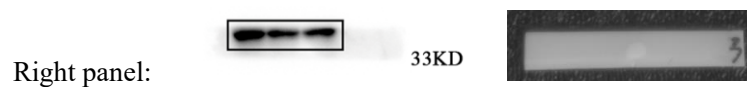

**Figure 3E**

**IGF2BP2**

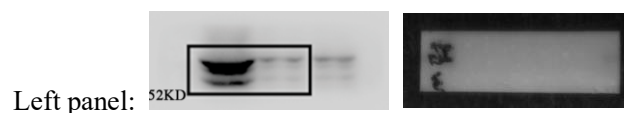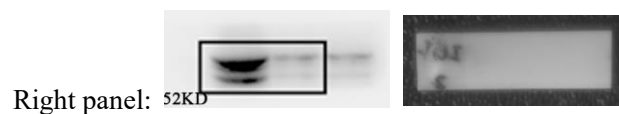

**FBXO43**

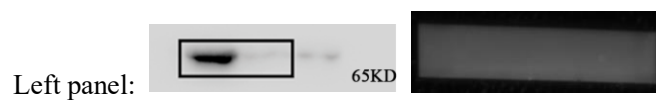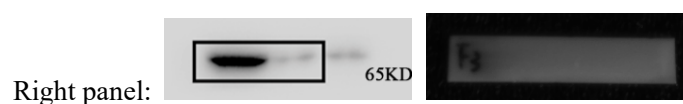

**GAPDH**

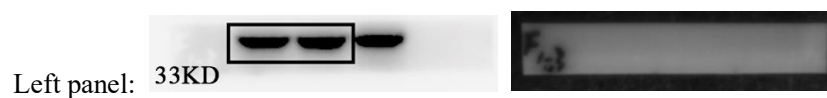



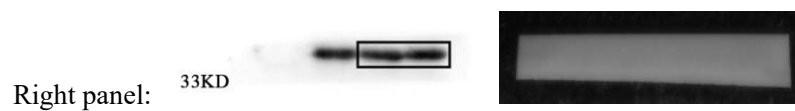

**Figure 3H**  
**IGF2BP2**

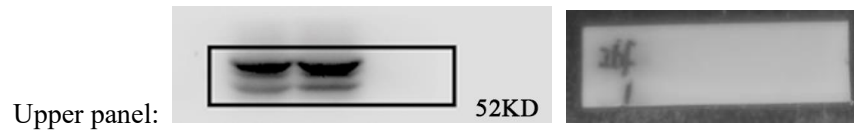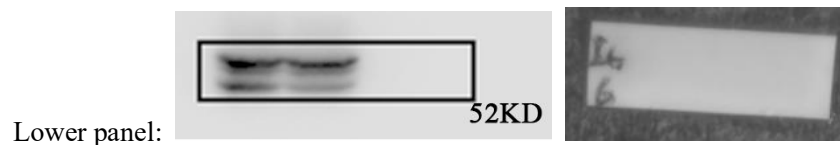

**GAPDH**

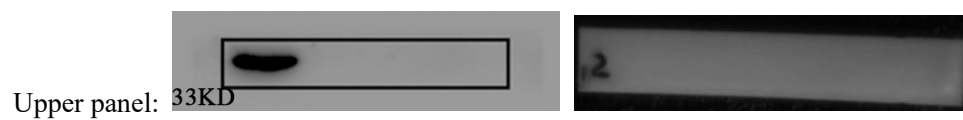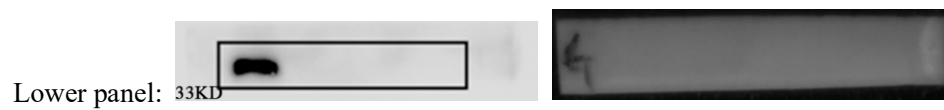

**Figure 3J**  
**METTL3**

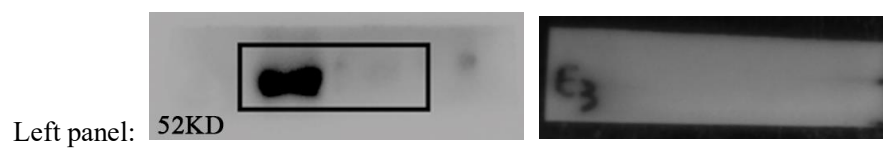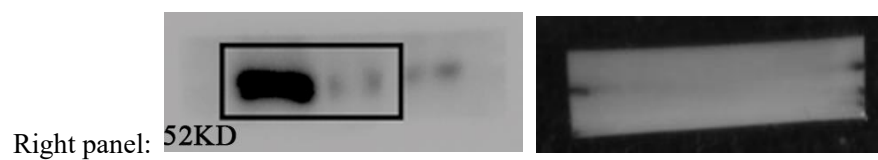

**FBXO43**

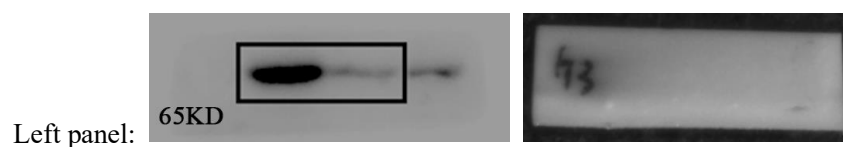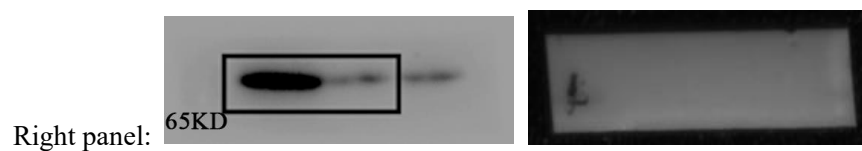

**GAPDH**

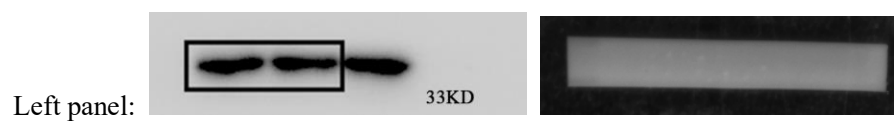

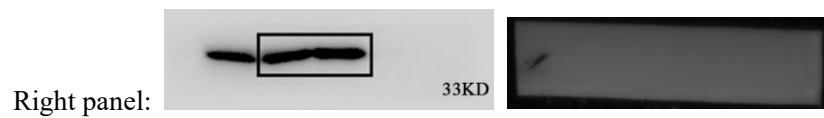

**Figure 4A**  
**FBXO43**

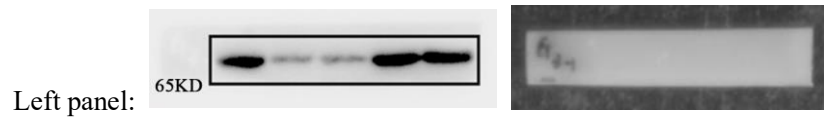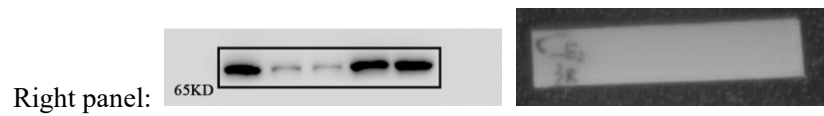

**METTL3**

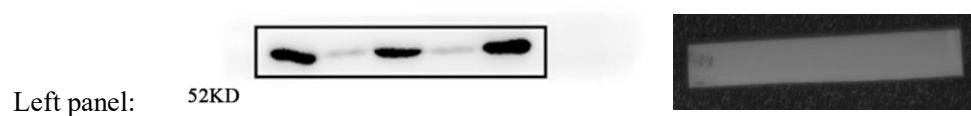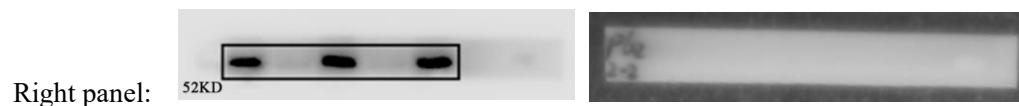

**IGF2BP2**

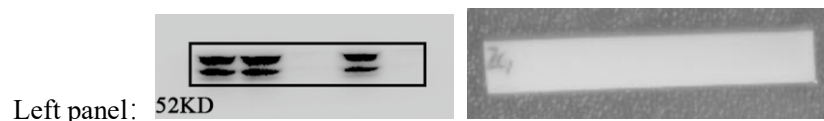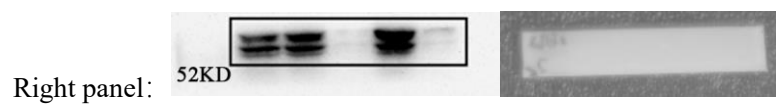

**GAPDH**

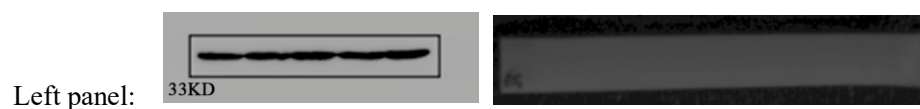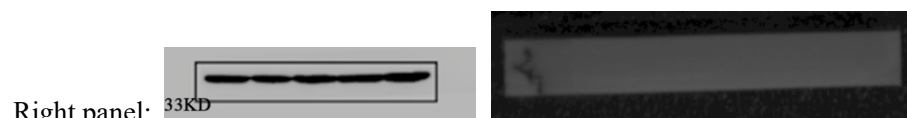

**Figure 5F**

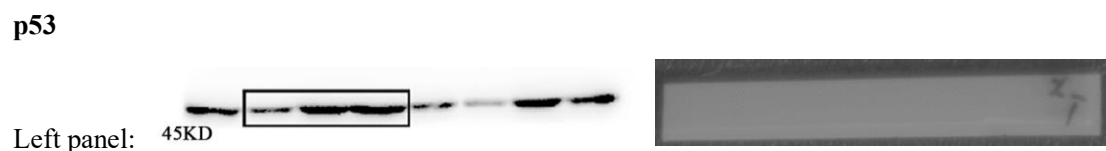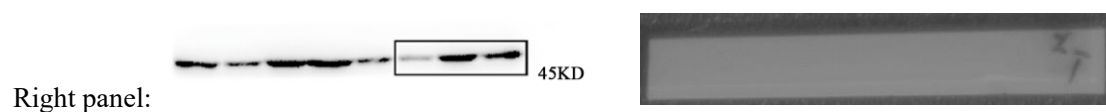

**UBE2C**

Left panel:

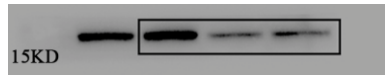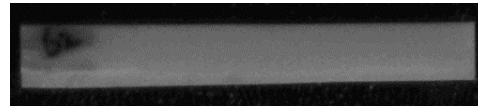

Right panel:

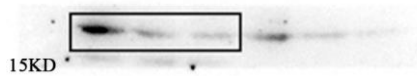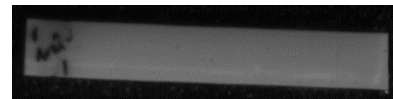

**GAPDH**

Left panel:

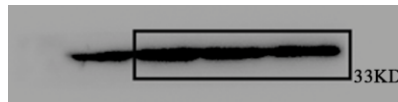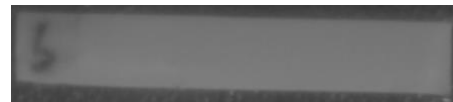

Right panel:

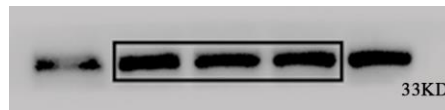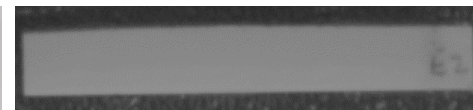

**Figure 5G**

**IP**

Left panel:

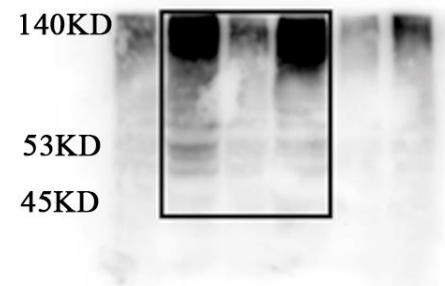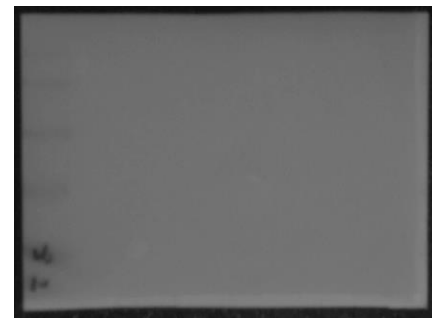

Right panel:

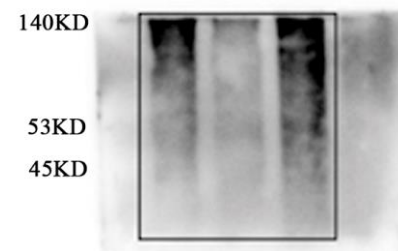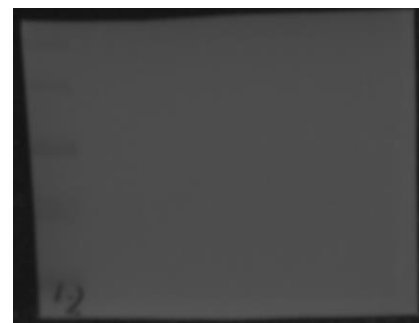

**p53**

Left panel:

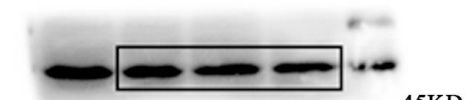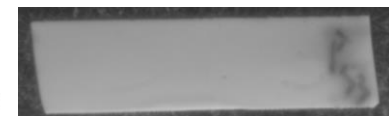

Right panel:

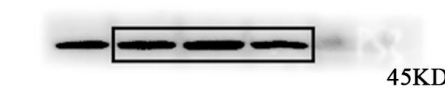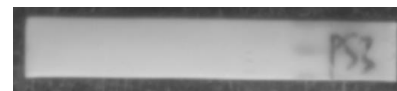

**UBE2C**

Left panel:

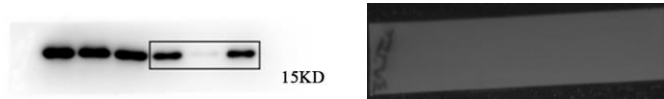

Right panel:

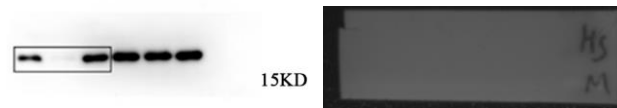

### GAPDH

Left panel:

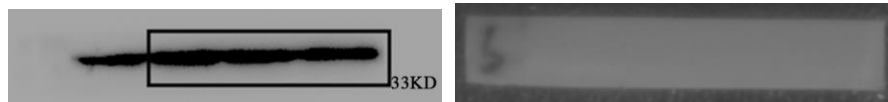

Right panel:

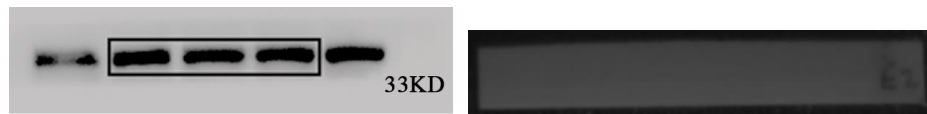

### Figure 6A

### UBE2C

Left panel:

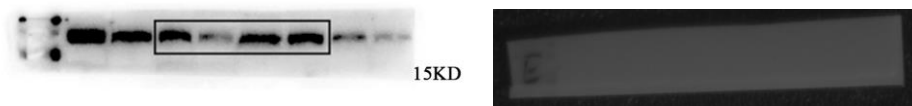

Right panel:

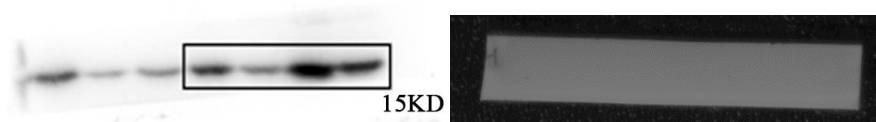

### p53

Left panel:

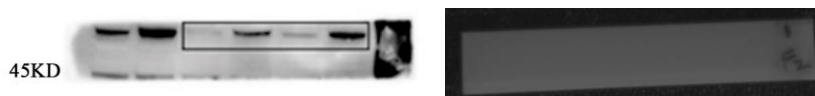

Right panel:

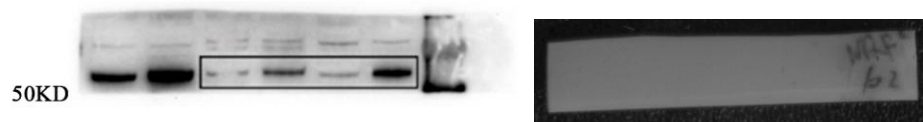

### FBXO43

Left panel:

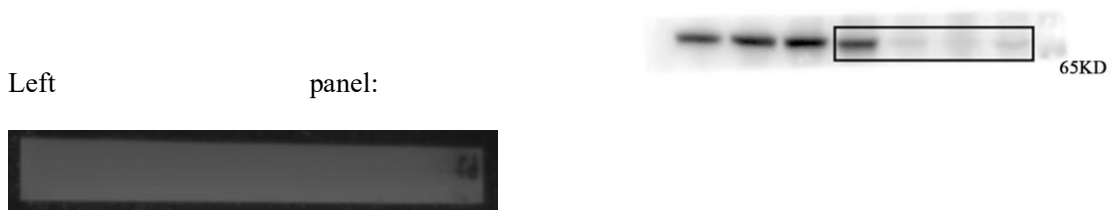

Right panel:

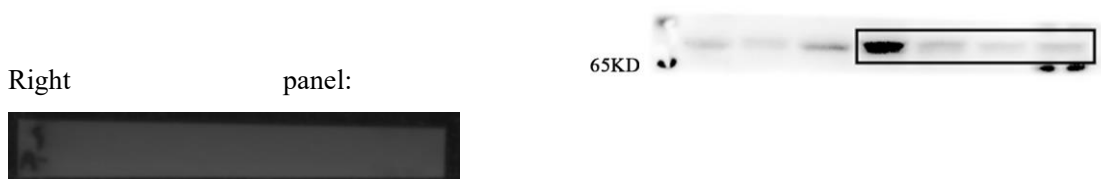

## GAPDH

Left panel:

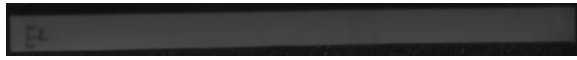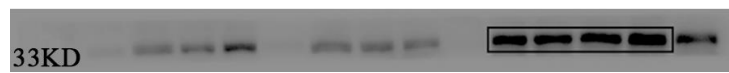

Right panel:

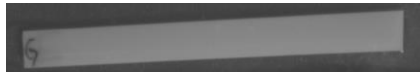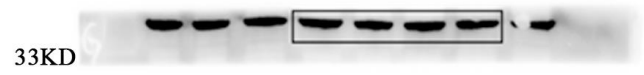

Supplement: s1 [file s1]
